# Supplementary material for: The role of NLRP3 inflammasome activation in the neuroinflammatory responses to Ag2Se quantum dots in microglia
Source: Royal Society of Chemistry journal article supplement (doi:10.1039/c9nr06778g), 2019-01-01
Supplement: c9nr06778g1.pdf [file c9nr06778g1.pdf]

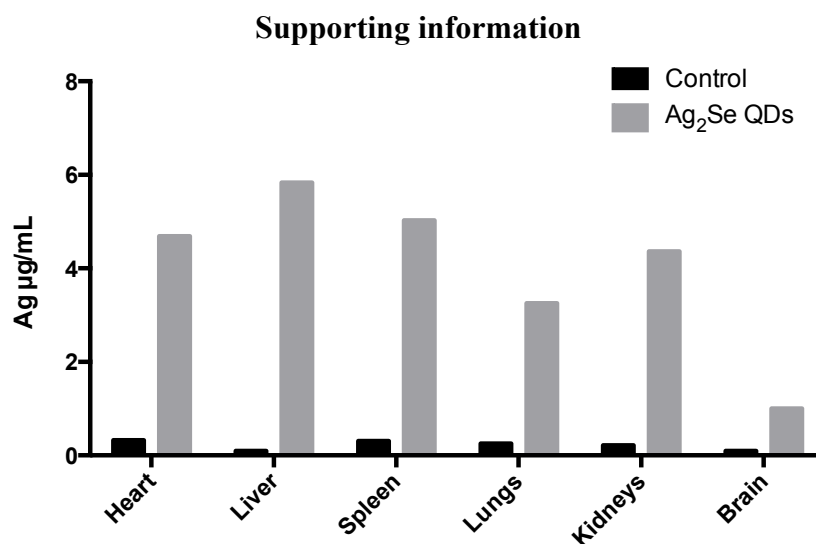

**Figure S1:** The Ag amount in the different organs, *i.e.* heart, liver, spleen, lungs, kidneys and brain, of mice treated with 2.5 mM × 0.1 mL/20 g BW Ag<sub>2</sub>Se QDs for 3 h (n=3).
